# Supplementary material
Source: HighWire-hosted journal article supplement (http://molpharm.aspetjournals.org/highwire/filestream/77473/field_highwire_adjunct_files/0/Supplemental_99598.pdf)
Supplement: Supplemental_99598.pdf [file Supplemental_99598.pdf]

Supplemental Data

**Marketed Drugs Can Inhibit Cytochrome P450 27A1 (CYP27A1), a Potential New Target  
for Breast Cancer Adjuvant Therapy**

Natalia Mast, Joseph B. Lin, and Irina A. Pikuleva

Molecular Pharmacology

**Supplemental Figure 1.** The studied (in bold) and other activities of CYP27A1.

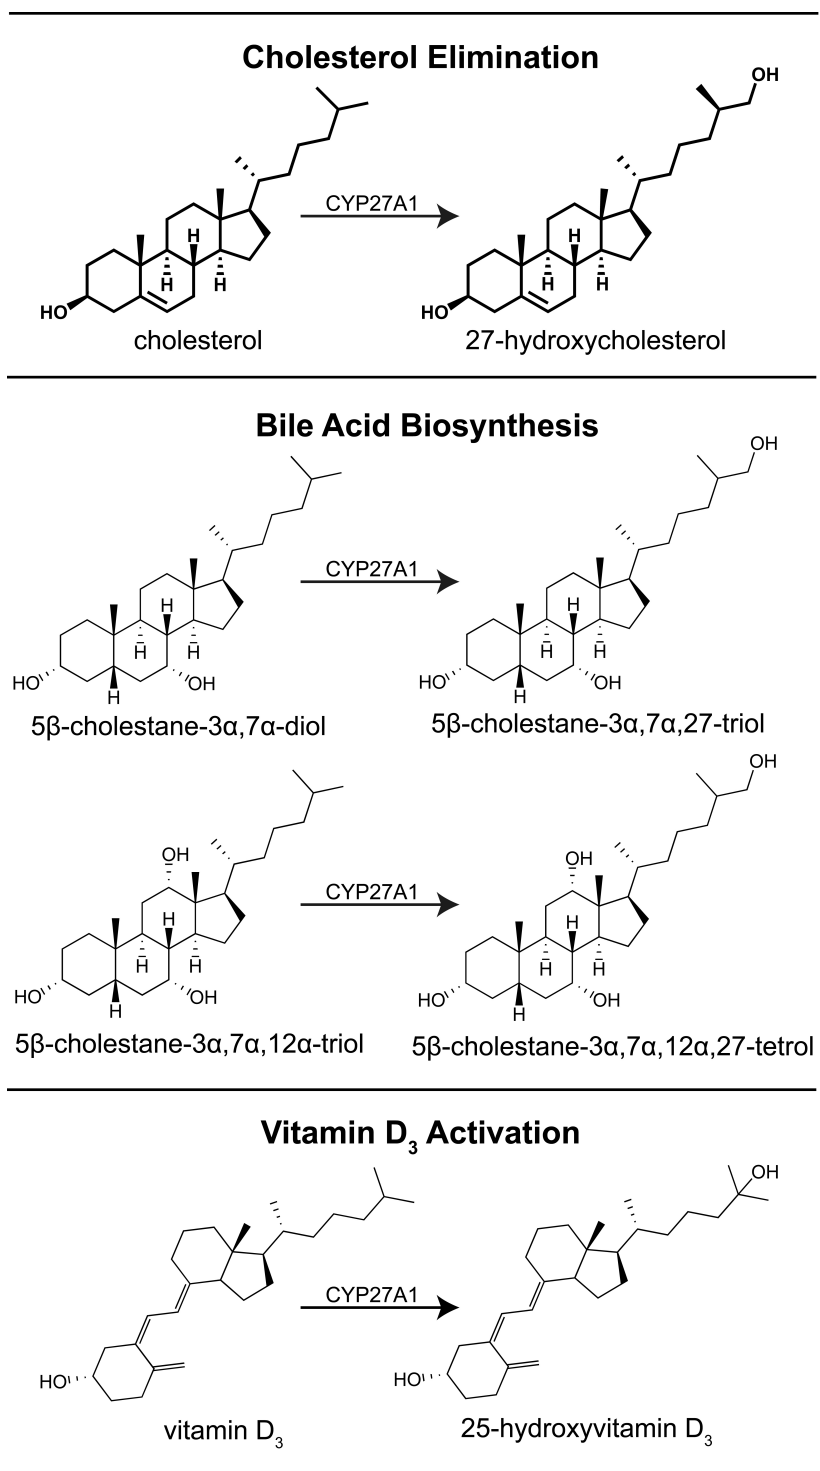

**Supplemental Table 1.** FDA-approved anti-cancer drugs and some of non-cancer drugs. Drugs that were excluded from screening are in gray and those that were tested are in black and underlined.

| <b>FDA-Approved Anti-Cancer Drugs (116)</b> |                             | <b>Non-Cancer Drugs</b>                   |                                                    |
|---------------------------------------------|-----------------------------|-------------------------------------------|----------------------------------------------------|
| <b>Bulky (38)</b>                           |                             | <b>Absorbing in visible region (2)</b>    | <b>Inhibitors of CYPs 46A1 and 11A1 (7)</b>        |
| abiraterone                                 | vandetanib                  | carmustine                                | <u>dexmedetomidine</u>                             |
| bleomycin                                   | vemurafenib                 | methotrexate                              | <u>fluvoxamine</u>                                 |
| cabazitaxel                                 | vinblastine                 |                                           | <u>hexaconazole</u>                                |
| carfilzomib                                 | <b>Peptide-based (22)</b>   | <b>Containing hindered nitrogens (21)</b> | <u>posaconazole</u>                                |
| dabrafenib                                  | alemtuzumab                 | afatinib                                  | <u>ravuconazole</u>                                |
| dactinomycin                                | asparaginase                | arsenic trioxide                          | <u>thioperamide</u>                                |
| daunorubicin                                | bevacizumab                 | bendamustine                              | <u>tranlycypromine</u>                             |
| degarelix                                   | brentuximab vedotin         | bexarotene                                |                                                    |
| docetaxel                                   | cetuximab                   | busulfan                                  | <b>Containing platinum (3)</b>                     |
| doxorubicin                                 | denosumab                   | cabozantinib                              | carboplatin                                        |
| enzalutamide                                | filgrastim                  | capecitabine                              | <u>cisplatin</u>                                   |
| epirubicin                                  | gemtuzumab ozogamicin       | chlorambucil                              | oxaliplatin                                        |
| erlotinib                                   | glucarpidase                | cyclophosphamide                          |                                                    |
| etoposide                                   | ibrutumomab tiuxetan        | dasatinib                                 | <b>Anti-breast cancer aromatase inhibitors (5)</b> |
| everolimus                                  | ipilimumab                  | eltrombopag                               | <u>aminoglutethimide</u>                           |
| fulvestrant                                 | obinutuzumab                | gefitinib                                 | <u>anastrozole</u>                                 |
| goserelin                                   | ofatumumab                  | ibrutinib                                 | <u>exemestane (steroid)</u>                        |
| ixabepilone                                 | palifermin                  | ifosfamide                                | <u>fadrozole</u>                                   |
| lapatinib                                   | panitumumab                 | irinotecan                                | <u>letrozole</u>                                   |
| leucovorin                                  | pegaspargase                | lomustine                                 |                                                    |
| leuprolide                                  | pertuzumab                  | mesna                                     |                                                    |
| megestrol                                   | rasburicase                 | palonosetron                              |                                                    |
| nilotinib                                   | rituximab                   | sunitinib malate                          |                                                    |
| paclitaxel                                  | romiplostim                 | tamoxifen                                 |                                                    |
| pazopanib                                   | tositumomab                 | toremifene                                |                                                    |
| plerixafor                                  | trastuzumab emtansine       |                                           |                                                    |
| ponatinib                                   |                             | <b>Nucleotide derivatives (6)</b>         |                                                    |
| pralatrexate                                | <b>Cost prohibitive (7)</b> | <u>azacitidine</u>                        |                                                    |
| raloxifene                                  | dexrazoxane                 | cytarabine                                |                                                    |
| romidepsin                                  | lenalidomide                | decitabine                                |                                                    |
| temsirolimus                                | mechlorethamine             | fludarabine                               |                                                    |
| topotecan                                   | pemetrexed                  | gemcitabine                               |                                                    |
| trametinib                                  | regorafenib                 | nelarabine                                |                                                    |
| vincristine                                 | ruxolitinib                 |                                           |                                                    |
| vinorelbine                                 | thalidomide                 |                                           |                                                    |
|                                             |                             |                                           | <b>Others (12)</b>                                 |
|                                             |                             |                                           | <u>aminolevulinic acid</u>                         |
|                                             |                             |                                           | <u>aprepitant</u>                                  |
|                                             |                             |                                           | <u>axitinib</u>                                    |
|                                             |                             |                                           | <u>bicalutamide</u>                                |
|                                             |                             |                                           | <u>clofarabine</u>                                 |
|                                             |                             |                                           | <u>crizotinib</u>                                  |
|                                             |                             |                                           | <u>dacarbazine</u>                                 |
|                                             |                             |                                           | <u>imexon</u>                                      |
|                                             |                             |                                           | <u>pamidronate</u>                                 |
|                                             |                             |                                           | <u>procarbazine</u>                                |
|                                             |                             |                                           | <u>temozolomide</u>                                |
|                                             |                             |                                           | <u>vorinostat</u>                                  |
